# Supplementary material for: Quantum Dot Nanobeads as Multicolor Labels for Simultaneous Multiplex Immunochromatographic Detection of Four Nitrofuran Metabolites in Aquatic Products
Source: MDPI journal article supplement (doi:10.3390/molecules27238324), 2022-11-29
Supplement: s1 [file s1]

## Supplementary Material

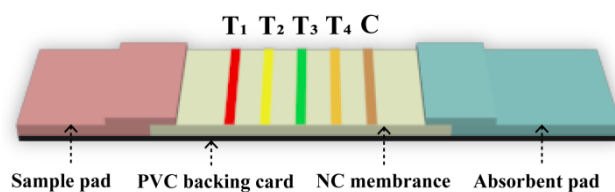

**Figure S1.** Schematic illustration of the QB-based mICA.

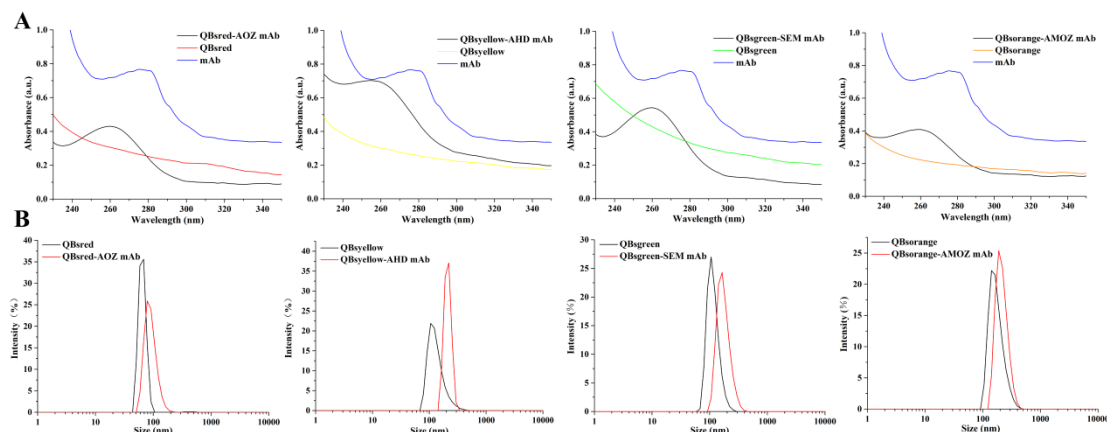

**Figure S2.** (A) UV-Vis absorption spectra of mAb, QBs and QB-mAb probes. (B) DLS analysis of QBs and QB-mAb probes.

**Table S1.** Linear equations based on mICA analysis for the nitrofuran metabolites.

| Analyte | Standard curve              | R <sup>2</sup> |
|---------|-----------------------------|----------------|
| AOZ     | $y = -0.350 \log x + 0.636$ | 0.970          |
| AHD     | $y = -0.247 \log x + 0.478$ | 0.984          |
| SEM     | $y = -0.182 \log x + 0.377$ | 0.979          |
| AMZO    | $y = -0.164 \log x + 0.333$ | 0.990          |

**Table S2.** Assay performances comparison of the published methods.

| Analytes | Methods       | Samples                                | LOD         | References            |
|----------|---------------|----------------------------------------|-------------|-----------------------|
| AHD      | SERS          | Sea cucumber                           | 5 ng/g      | Fan et al., 2021      |
| AHD      | ELISA         | Water                                  | 0.2 ppb     | Liu et al., 2007      |
| AOZ      | Immunoassay   | Milk powder/Shrimp                     | 0.43 ng/mL  | Su et al., 2021       |
| AMZO     | ELISA         | Shrimps                                | 0.16 µg/kg  | Pimpitak et al., 2009 |
| AMZO     | Immunosensor  | Food samples                           | 1 ng/mL     | Jin et al., 2011      |
| SEM      | HPLC          | Food matrices                          | 0.4 µg/kg   | Li et al., 2014       |
| AOZ      | Multiplex ICA | Red drum/Grass carp/Shrimp/<br>Scallop | 0.198 ng/mL | This work             |
| AHD      |               |                                        | 0.138 ng/mL |                       |
| SEM      |               |                                        | 0.071 ng/mL |                       |
| AMZO     |               |                                        | 0.157 ng/mL |                       |

**Table S3.** Recoveries of QB-based mICA strip for the detection of nitrofuran metabolites.

| Sample | Spiked (ng/mL) | Measured (ng/mL) | Recovery (%) | RSD (%) |
|--------|----------------|------------------|--------------|---------|
| AOZ    | 0.5            | 0.43             | 86.2         | 5.86    |
|        | 5              | 4.67             | 93.3         | 0.49    |
|        | 50             | 40.99            | 82.0         | 8.84    |
| AHD    | 0.5            | 0.44             | 88.6         | 6.71    |
|        | 5              | 4.61             | 92.2         | 3.84    |
|        | 50             | 42.12            | 84.2         | 9.33    |
| SEM    | 0.5            | 0.46             | 92.0         | 3.69    |
|        | 5              | 4.44             | 88.7         | 1.21    |
|        | 50             | 42.43            | 84.9         | 5.64    |
| AMOE   | 0.5            | 0.46             | 91.9         | 7.52    |
|        | 5              | 4.52             | 90.3         | 2.13    |
|        | 50             | 46.49            | 93.0         | 5.40    |

**Table S4.** Application of QB-based mICA strip to detect nitrofuran metabolites in different samples.

| sample     | AOZ            |                      | AHD            |         | SEM            |         | AMOE           |         | mICA images                                                                           |
|------------|----------------|----------------------|----------------|---------|----------------|---------|----------------|---------|---------------------------------------------------------------------------------------|
|            | Spiked (μg/kg) | mICA                 | Spiked (μg/kg) | mICA    | Spiked (μg/kg) | mICA    | Spiked (μg/kg) | mICA    |                                                                                       |
| Red drum   | 0.5            | +,+,+ <sup>a</sup>   | 0.5            | +,+,+   | 0.5            | +,+,+   | 0.5            | +,+,+   | 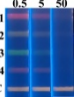 |
|            | 5              | ±,±,± <sup>b</sup>   | 5              | ±,±,±   | 5              | ±,±,±   | 5              | ±,±,±   |                                                                                       |
|            | 50             | -, -, - <sup>c</sup> | 50             | -, -, - | 50             | -, -, - | 50             | -, -, - |                                                                                       |
| Grass carp | 0.5            | +,+,+                | 0.5            | +,+,+   | 0.5            | +,+,+   | 0.5            | +,+,+   |  |
|            | 5              | ±,±,±                | 5              | ±,±,±   | 5              | ±,±,±   | 5              | ±,±,±   |                                                                                       |
|            | 50             | -, -, -              | 50             | -, -, - | 50             | -, -, - | 50             | -, -, - |                                                                                       |
| shrimp     | 0.5            | +,+,+                | 0.5            | +,+,+   | 0.5            | +,+,+   | 0.5            | +,+,+   |  |
|            | 5              | ±,±,±                | 5              | ±,±,±   | 5              | ±,±,±   | 5              | ±,±,±   |                                                                                       |
|            | 50             | -, -, -              | 50             | -, -, - | 50             | -, -, - | 50             | -, -, - |                                                                                       |
| scallop    | 0.5            | +,+,+                | 0.5            | +,+,+   | 0.5            | +,+,+   | 0.5            | +,+,+   |  |
|            | 5              | ±,±,±                | 5              | ±,±,±   | 5              | ±,±,±   | 5              | ±,±,±   |                                                                                       |
|            | 50             | -, -, -              | 50             | -, -, - | 50             | -, -, - | 50             | -, -, - |                                                                                       |

<sup>a</sup> Negative result. An obvious fluorescence band was observed.<sup>b</sup> Weakly positive result. The fluorescence band was light.<sup>c</sup> Positive result. No fluorescence band was observed.
